# Supplementary material
Source: PubMed Central journal article supplement (PMC4615734)
Supplement: thnov05p1303s1.pdf [file thnov05p1303s1.pdf]

## Supplementary Materials for

### **First-in-human uPAR PET: imaging of cancer aggressiveness**

**Morten Persson<sup>1#</sup>, Dorthe Skovgaard<sup>1#</sup>, Malene Brandt-Larsen<sup>1</sup>, Camilla Christensen<sup>1</sup>, Jacob Madsen<sup>1</sup>, Carsten H. Nielsen<sup>1</sup>, Tine Thurison<sup>2</sup>, Thomas Levin Klausen<sup>1</sup>, Søren Holm<sup>1</sup>, Annika Loft<sup>1</sup>, Anne Kiil Berthelsen<sup>1</sup>, Michael Ploug<sup>2</sup>, Helle Pappot<sup>3</sup>, Klaus Brasso<sup>4</sup>, Niels Kroman<sup>5</sup>, Liselotte Højgaard<sup>1</sup>, Andreas Kjaer<sup>1\*</sup>**

\*Corresponding author: E-mail: akjaer@sund.ku.dk

#### **Supplementary Materials**

Fig. S1. Batch chromatograms and purity

Fig. S2. Serial Whole-body PET/CT images of the biodistributions of <sup>64</sup>Cu-DOTA-AE105

Fig. S3. Blood biochemistry parameters before and after the study in each patient

Fig. S4. uPAR immunohistochemistry staining of tumor tissue

Fig. S5. MR and uPAR PET/CT of meningioma in patient 6

Fig. S6. Soluble uPAR forms in plasma

Fig. S7. Chemical analysis validation

Table S1. Injected dose, masses and purity for each batch

Table S2: Patient Hematology/biochemistry data

Table S3: Blood pressure and pulse during PET/CT scans

Table S4. Observed and predicted dosimetry for uPAR PET

Table S5. Raw data for dosimetry estimation

Table S6. Process validation batches result

Table S7. Product release criteria

**Figure S1**

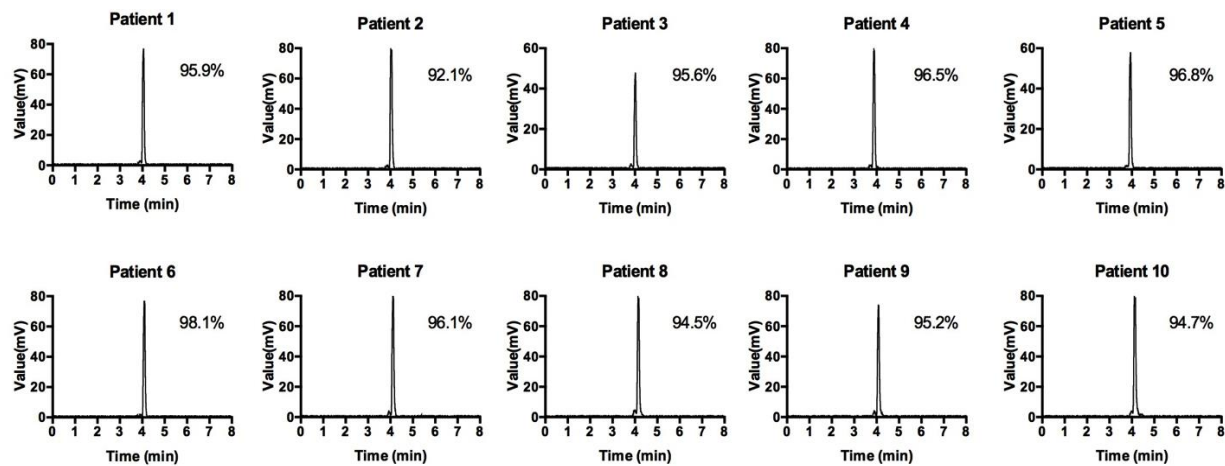

**Fig. S1. Batch chromatograms and purity.** RP-HPLC Chromatograms, including purity, for all 10 batches of  $^{64}\text{Cu}$ -DOTA-AE105 used for injection in the study.

**Figure S2**

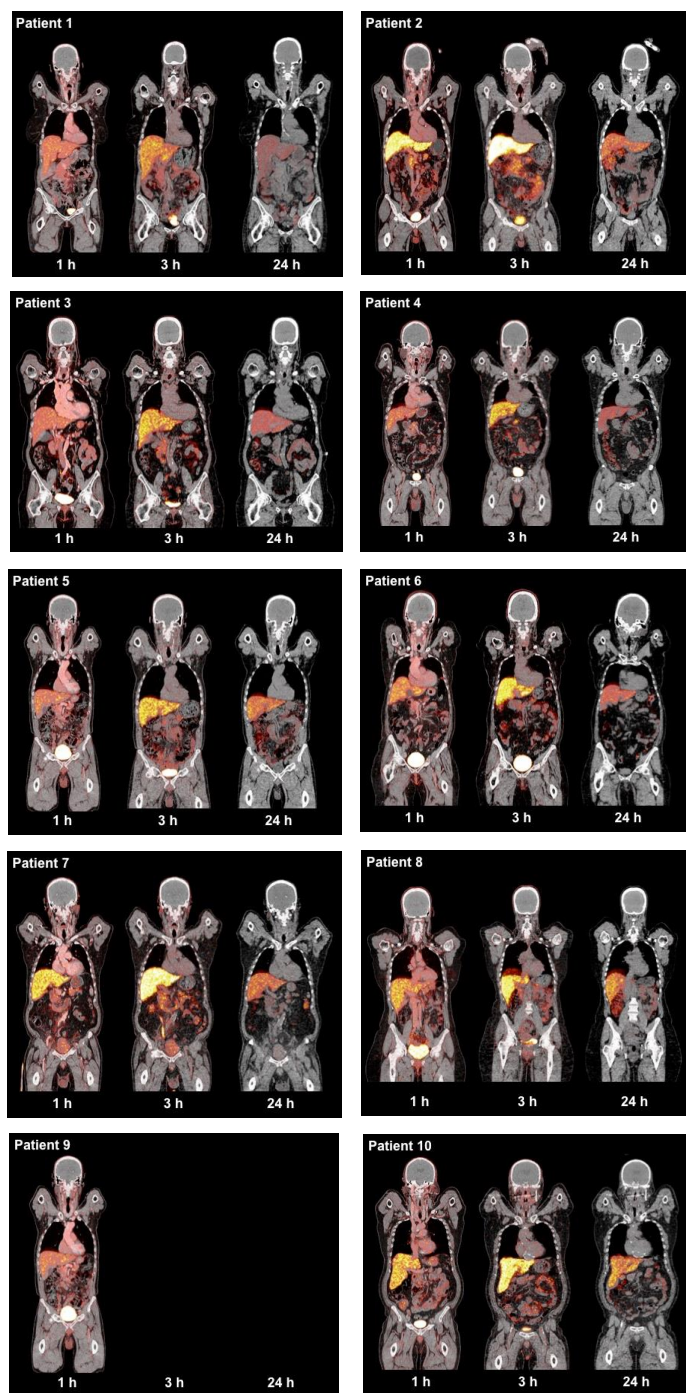

**Fig. S2.** Serial Whole-body PET/CT images of the biodistributions of  $^{64}\text{Cu}$ -DOTA-AE105. PET/CT fusion images for all 10 patients acquired at 1, 3 and 24 hours following i.v. injection of  $^{64}\text{Cu}$ -DOTA-AE105.

Figure S3

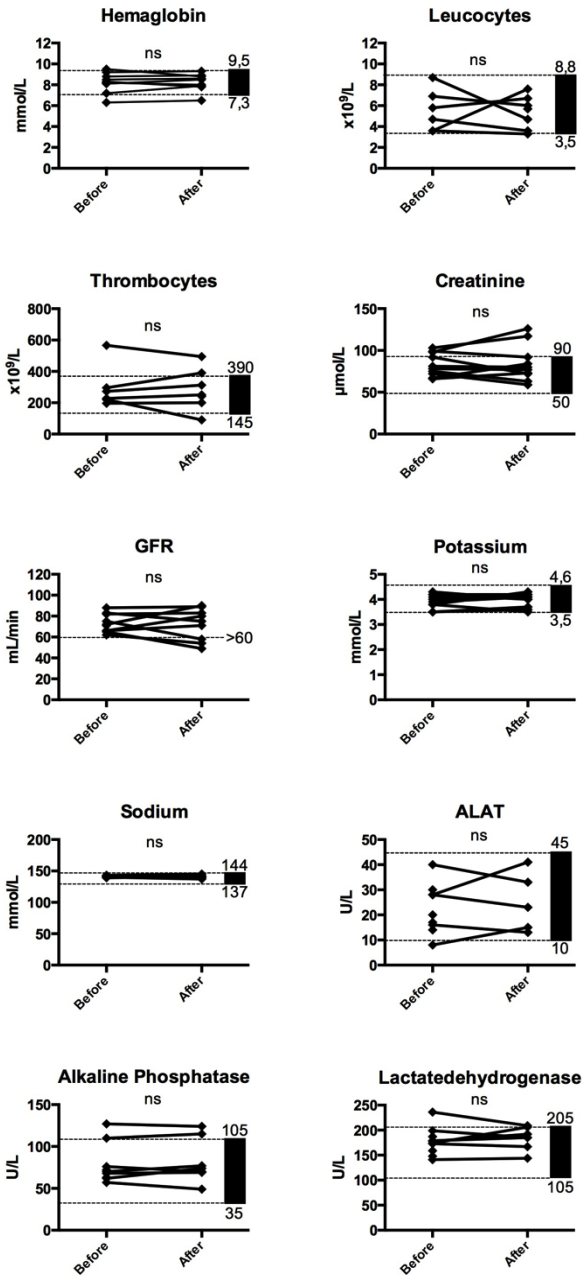

**Fig. S3. Blood biochemistry parameters before and after the study in each patient.** Individual plot of hemoglobin, leucocytes, thrombocytes, creatinine, estimated glomerular filtration rate (eGFR), potassium, sodium, alanine aminotransferase (ALAT), alkaline phosphatase and lactate-dehydrogenase before and after PET/CT scan with  $^{64}\text{Cu}$ -DOTA-AE105. No significant differences in any parameter were found. Black bars in the right side of the figure with top-bottom values indicate reference interval.

## Figure S4

A

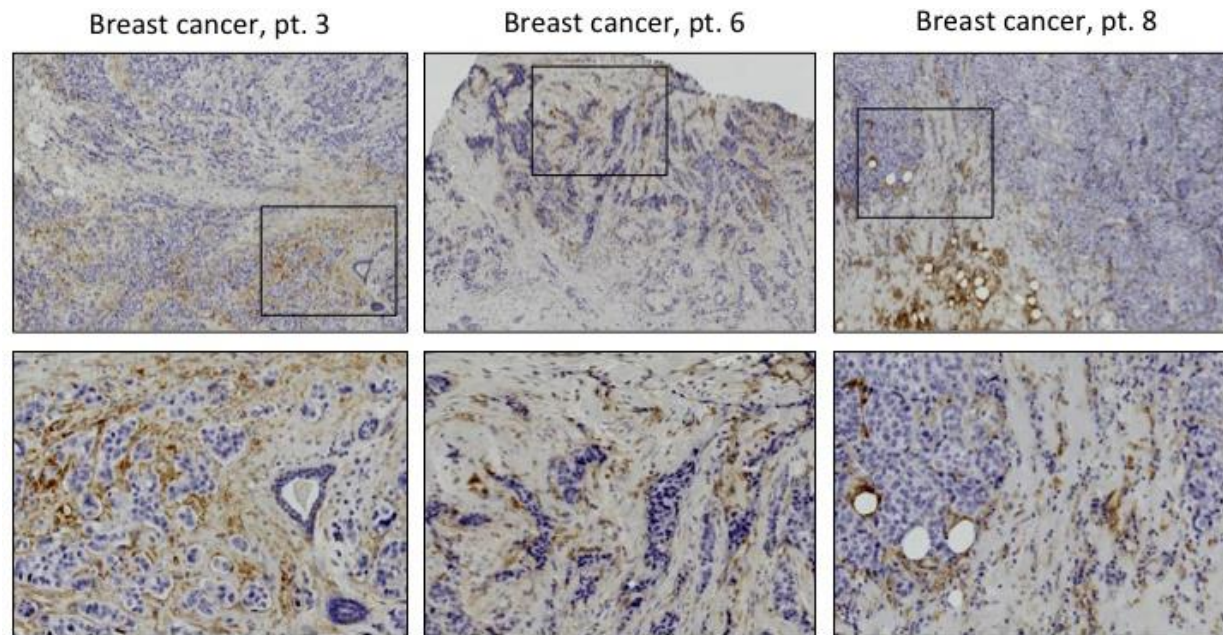

B

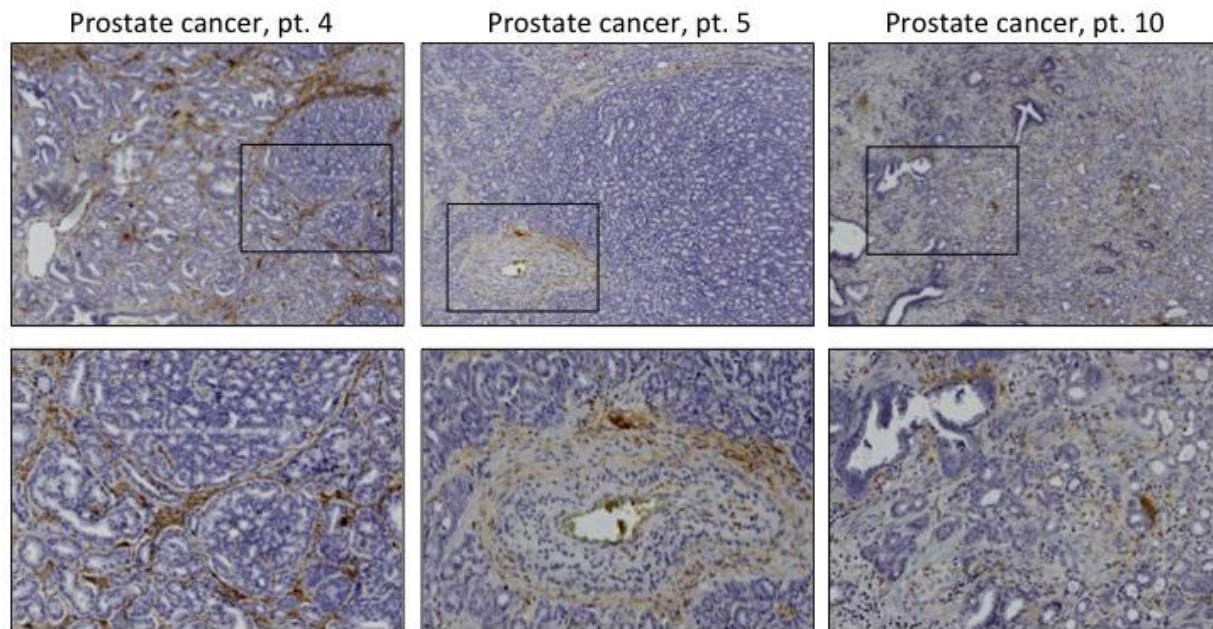

**Fig. S4. uPAR immunohistochemistry staining of tumor tissue.** (A) Representative uPAR stained slides for each breast cancer patient. uPAR expression was confirmed in all three patients. (B) Representative uPAR stained slides for each prostate cancer patients. uPAR expression was confirmed in all three tumors.

**Figure 5S**

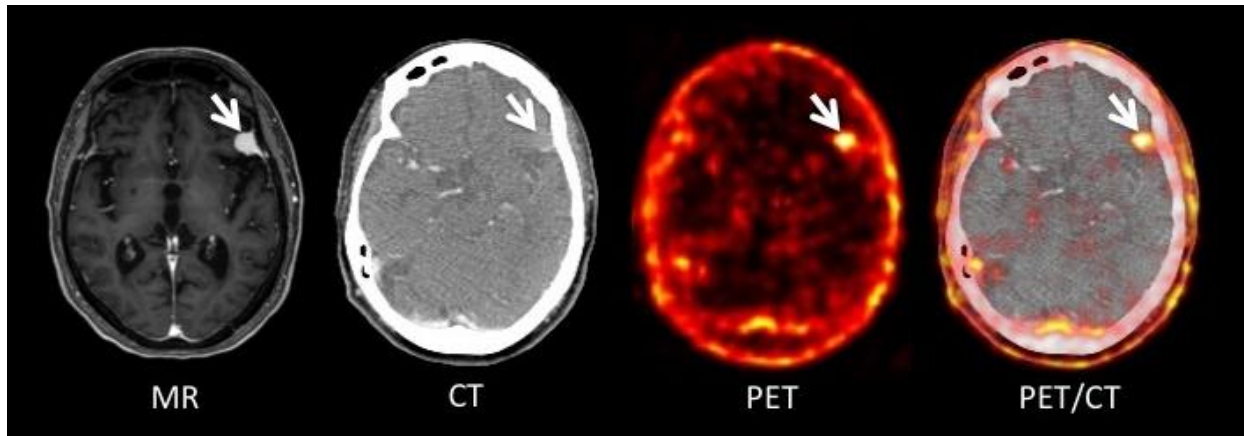

**Fig. S5. MR and uPAR PET/CT of meningioma in patient 6.** Transversal contrast-enhanced T1 weighted MRI followed by CT, uPAR PET and co-registered PET/CT image of a brain lesion (meningioma, white arrow). High uptake of activity was found in patient 6 with an SUVmean and SUVmax of 2.83 and 4.29, respectively.

**Figure S6**

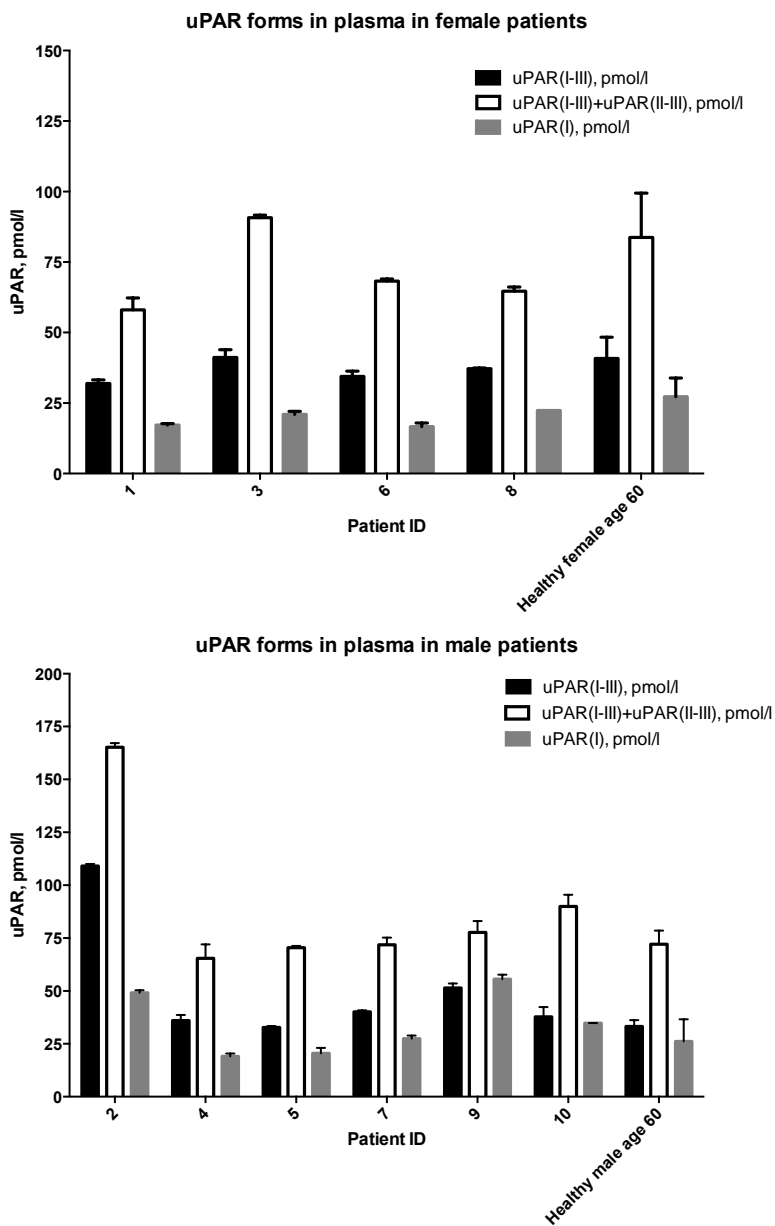

**Fig. S6. Soluble uPAR forms in plasma.** Circulating uPAR forms were measured in EDTA plasma inform blood samples taken from each patient at the time of injection of  $^{64}\text{Cu}$ -DOTA-AE105. Data are presented in female (top) and male (bottom) patients as mean level with %CV values. The geometric mean levels for healthy males and females at age 60 are presented for comparison. uPAR(I-III): full length uPAR, uPAR(II-III): uPAR domain II + domain III, uPAR(I): uPAR domain I.

Figure S7

**A** Linearity

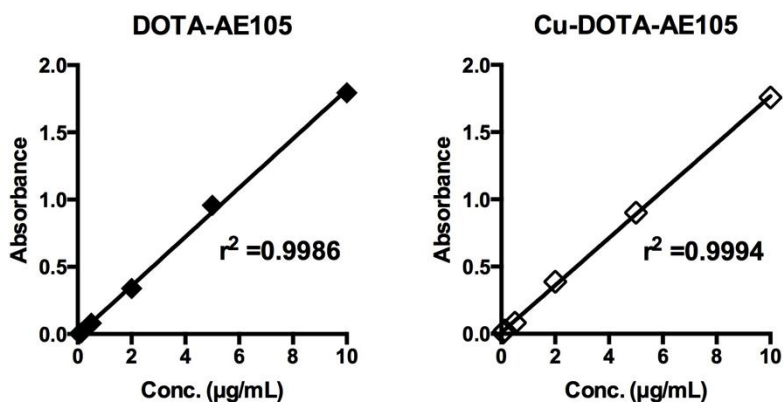

**B** Accuracy

DOTA-AE105

| Expected concentration (µg/ml) | Found concentration (µg/ml) | Recovery (%) |
|--------------------------------|-----------------------------|--------------|
| 1.0                            | 0.99                        | 99.3         |
| 2.0                            | 1.90                        | 95.0         |
| 3.0                            | 3.05                        | 101.5        |
| 5.0                            | 5.02                        | 100.5        |
| 10.0                           | 10.4                        | 103.6        |

Specification: recovery: 90-110%

Cu-DOTA-AE105

| Expected concentration (µg/ml) | Found concentration (µg/ml) | Recovery (%) |
|--------------------------------|-----------------------------|--------------|
| 1.0                            | 0.99                        | 99.4         |
| 2.0                            | 1.99                        | 99.7         |
| 3.0                            | 2.96                        | 98.7         |
| 5.0                            | 4.59                        | 91.9         |
| 10.0                           | 10.3                        | 102.8        |

Specification: recovery: 90-110%

**C** Sensitivity

DOTA-AE105: LOD (S/N=3) = 0.06 µg/ml      LOQ (S/N = 10) = 0.125 µg/ml

Cu-DOTA-AE105: LOD (S/N=3) = 0.03 µg/ml      LOQ (S/N = 10) = 0.06 µg/ml

**Fig. S7. Chemical analysis validation** (A) Linearity after analysis using HPLC. (B) Accuracy and (C) sensitivity of the HPLC analysis. All tests were within specification limits.



**Table S1: Injected dose, mass, specific activity and purity for each batch**

| Pt. #       | Dose (MBq)   | Batch activity (MBq) | SA (GBq/ $\mu$ mol) | Purity (%)  | Mass ( $\mu$ g) |
|-------------|--------------|----------------------|---------------------|-------------|-----------------|
| 1           | 205          | 1376                 | 341                 | 95.9        | 1.01            |
| 2           | 208          | 649                  | 285                 | 92.1        | 1.22            |
| 3           | 200          | 421                  | 232                 | 95.6        | 1.44            |
| 4           | 201          | 1141                 | 206                 | 96.5        | 1.63            |
| 5           | 197.5        | 552                  | 190                 | 96.8        | 1.74            |
| 6           | 201.1        | 697.1                | 323                 | 98.1        | 1.04            |
| 7           | 197.3        | 674.8                | 266                 | 96.1        | 1.24            |
| 8           | 211.6        | 803.9                | 340                 | 94.5        | 1.04            |
| 9           | 209          | 700.1                | 262                 | 95.2        | 1.34            |
| 10          | 212.8        | 819.5                | 362                 | 94.7        | 0.98            |
| <b>MEAN</b> | <b>204.3</b> | <b>783.4</b>         | <b>280.7</b>        | <b>95.6</b> | <b>1.27</b>     |
| <b>SD</b>   | <b>5,7</b>   | <b>280.9</b>         | <b>59.9</b>         | <b>1.6</b>  | <b>0.27</b>     |

| <b>Table S2: Patient Hematology/biochemistry data</b> |           |       |           |       |           |       |           |       |           |       |           |       |           |       |           |       |           |       |            |       |
|-------------------------------------------------------|-----------|-------|-----------|-------|-----------|-------|-----------|-------|-----------|-------|-----------|-------|-----------|-------|-----------|-------|-----------|-------|------------|-------|
|                                                       | Patient 1 |       | Patient 2 |       | Patient 3 |       | Patient 4 |       | Patient 5 |       | Patient 6 |       | Patient 7 |       | Patient 8 |       | Patient 9 |       | Patient 10 |       |
| Parameter                                             | Before    | After | Before     | After |
| Hemaglobin (mmol/L)                                   | 6.3       | 6.5   | 7.2       | 7.9   | 8.3       | 7.8   | 8.5       | 8.6   | 9.2       | 9.3   | 8.1       | 8.5   | 9.5       | 8.8   | 8.2       | 8     | 8.8       | 8.9   | 8.3        | -     |
| Leucocytes (x10 <sup>9</sup> /L)                      | 3.6       | 7.6   | 3.6       | 3.3   | 5.8       | 6.7   | -         | 5.7   | -         | -     | 4.7       | 3.6   | 8.7       | 4.7   | 6.9       | 6     | -         | -     | -          | -     |
| Thrombocytes (x10 <sup>9</sup> /L)                    | 566       | 494   | 295       | 390   | 227       | 250   | -         | 241   | -         | -     | 196       | 200   | 220       | 90    | 272       | 312   | -         | -     | -          | -     |
| Creatinine (μmol/L)                                   | 72        | 59    | 103       | 117   | 67        | 84    | 92        | 72    | 81        | 80    | 75        | 63    | 98        | 126   | 66        | 73    | 78        | 77    | 99         | 92    |
| GFR (ml/min per 1.73 m <sup>2</sup> )                 | 72        | 90    | 62        | 54    | 75        | 58    | 71        | -     | 82        | 83    | 66        | 80    | 65        | 49    | 83        | 75    | 88        | 89    | 66         | 71    |
| Potassium (mmol/L)                                    | 4.3       | 4     | 4.2       | 4     | 3.8       | 4.3   | 3.9       | 4.1   | 4.2       | 4.2   | 3.5       | 3.7   | 3.8       | 3.5   | 4         | 4.1   | 3.5       | 3.6   | 4.1        | 4.2   |
| Sodium (mmol/L)                                       | 139       | 141   | 140       | 137   | 143       | 142   | 141       | 139   | 140       | 142   | 143       | 145   | 141       | 139   | 140       | 139   | 140       | 141   | 142        | 141   |
| ALAT (U/L)                                            | -         | -     | 28        | 23    | 40        | 33    | 17        | -     | 20        | -     | 8         | 15    | 16        | 13    | 28        | 41    | 30        | -     | 14         | -     |
| Alkaline Phosphatase (U/L)                            | 68        | 69    | 110       | 115   | 127       | 124   | 57        | 49    | 72        | -     | 76        | 70    | 70        | 77    | 62        | 74    | 63        | -     | 27         | -     |
| Lactatedehydrogenase (U/L)                            | 179       | 185   | 178       | 192   | 199       | 185   | 173       | 167   | 187       | -     | 174       | 206   | 236       | 209   | 141       | 144   | 159       | -     | 148        | -     |

- Value is missing

**Table S3: Blood pressure and pulse during PET/CT scans**

| Time      | Before   |           |       | 1 min post injection |           |       | 10 min post injection |           |       | 1 hour post injection |           |       | 3 hours post injection |           |       | 24 hours post injection |           |       |
|-----------|----------|-----------|-------|----------------------|-----------|-------|-----------------------|-----------|-------|-----------------------|-----------|-------|------------------------|-----------|-------|-------------------------|-----------|-------|
| Patient # | Systolic | Diastolic | Pulse | Systolic             | Diastolic | Pulse | Systolic              | Diastolic | Pulse | Systolic              | Diastolic | Pulse | Systolic               | Diastolic | Pulse | Systolic                | Diastolic | Pulse |
| 1         | 120      | 86        | 69    | 132                  | 88        | 72    | 122                   | 81        | 72    | 124                   | 85        | 73    | 129                    | 77        | 74    | 73*                     | 38*       | 99*   |
| 2         | 179      | 89        | 65    | -                    | -         | -     | -                     | -         | -     | -                     | -         | -     | -                      | -         | -     | 181                     | 90        | 67    |
| 3         | 137      | 86        | 67    | 143                  | 92        | 65    | 156                   | 94        | 70    | 156                   | 94        | 70    | 162                    | 84        | 50    | 144                     | 81        | 55    |
| 4         | 130      | 80        | 76    | 102                  | 98        | 86    | 137                   | 90        | 75    | 144                   | 88        | 76    | 141                    | 93        | 87    | 132                     | 82        | 72    |
| 5         | 164      | 94        | 54    | 152                  | 92        | 52    | 162                   | 96        | 54    | 160                   | 91        | 53    | 153                    | 86        | 56    | 149                     | 96        | 58    |
| 6         | 170      | 74        | 86    | 170                  | 74        | 86    | 138                   | 95        | 80    | 143                   | 84        | 84    | 126                    | 80        | 86    | 146                     | 84        | 78    |
| 7         | 161      | 84        | 70    | 163                  | 90        | 68    | 156                   | 87        | 67    | -                     | -         | -     | 161                    | 84        | 70    | 156                     | 85        | 72    |
| 8         | 141      | 80        | 84    | -                    | -         | -     | 124                   | 77        | 74    | -                     | -         | -     | -                      | -         | -     | -                       | -         | -     |
| 9         | 191      | 97        | 87    | 190                  | 103       | 88    | 181                   | 89        | 82    | 208                   | 105       | 96    | Scan not performed     |           |       | Scan not performed      |           |       |
| 10        | 161      | 70        | 68    | 165                  | 75        | 67    | 153                   | 69        | 64    | 175                   | 77        | 69    | 165                    | 75        | 67    | 126                     | 65        | 63    |

\*Patient 1 was diagnose with a urinary tract injection on the same morning the 24 hour scan was performed and had high fever.

- Value is missing.

**Table S4: Observed and predicted dosimetry for uPAR PET**

| Organ/Tissue               | Mean absorbed dose<br>(mGy/MBq) |                   |
|----------------------------|---------------------------------|-------------------|
|                            | <i>Observed</i>                 | <i>Predicted*</i> |
| Adrenals                   | 3,10E-02                        | 2,59E-02          |
| Brain                      | 2,57E-03                        | 2,27E-02          |
| Breast                     | 9,05E-03                        | 2,11E-02          |
| Gallbladder wall           | 5,19E-02                        | 2,83E-02          |
| Lower large intestine wall | 3,27E-02                        | 2,50E-02          |
| Small intestine            | 4,87E-02                        | 4,92E-02          |
| Stomach wall               | 2,32E-02                        | 2,52E-02          |
| Upper large intestine wall | 4,82E-02                        | 2,69E-02          |
| Heart wall                 | 5,02E-02                        | 7,86E-02          |
| Kidneys                    | 5,62E-02                        | 2,97E-02          |
| Liver                      | 1,75E-01                        | 6,38E-02          |
| Lungs                      | 1,95E-02                        | 1,81E-02          |
| Muscle                     | 1,10E-02                        | 1,28E-02          |
| Ovaries                    | 1,33E-02                        | 2,56E-02          |
| Pancreas                   | 5,55E-02                        | 2,68E-02          |
| Red marrow                 | 1,43E-02                        | 2,41E-02          |
| Osteogenic cells           | 2,60E-02                        | 5,48E-02          |
| Skin                       | 7,75E-03                        | 1,89E-02          |
| Spleen                     | 2,04E-02                        | 2,88E-02          |
| Testes                     | 8,64E-03                        | 2,14E-02          |
| Thymus                     | 1,01E-02                        | 2,41E-02          |
| Thyroid                    | 1,66E-02                        | 2,21E-02          |
| Urinary bladder wall       | 4,60E-02                        | 2,93E-02          |
| Uterus                     | 1,31E-02                        | -                 |
| Total body                 | 1,78E-02                        | 2,58E-02          |
| Effective dose (mSv/MBq)   | 2,76E-02                        | 2,51E-02          |

\*Based on data from mice (*Persson et al. 2013, ref. 24*)

- Value is missing.

**Table S5: Raw data for dosimetry estimation**

|               | Bq/mL   |         |        |          |         |        |         |         |        |          |         |        |         |         |        |         |         |        |
|---------------|---------|---------|--------|----------|---------|--------|---------|---------|--------|----------|---------|--------|---------|---------|--------|---------|---------|--------|
| Patient ID    | #3      |         |        | #4       |         |        | #5      |         |        | #6       |         |        | #8      |         |        | #10     |         |        |
| Time (h)      | 1       | 3       | 24     | 1        | 3       | 24     | 1       | 3       | 24     | 1        | 3       | 24     | 1       | 3       | 24     | 1       | 3       | 24     |
| Brain         | 309.7   | 90.7    | 28.6   | 156.6    | 69.4    | 69.7   | 234.7   | 108.5   | 42.3   | 366.2    | 150.8   | 31.2   | 170.8   | 72.8    | 36.8   | 145.8   | 131.8   | 37.6   |
| Thyroid       | 4567.8  | 2647.3  | 382.1  | 1979.6   | 1736.5  | 694.8  | 2571.1  | 1789.5  | 351.1  | 3229.7   | 2337.3  | 486.7  | 3039.6  | 1422.5  | 403.3  | 3194.5  | 1479.8  | 287.3  |
| Lung          | 1483.4  | 559.6   | 126.5  | 979.6    | 449.7   | 290.2  | 705.6   | 977.0   | 81.7   | 1449.9   | 588.9   | 144.5  | 1367.5  | 507.9   | 161.6  | 588.1   | 274.4   | 89.6   |
| Heart         | 5728.1  | 1722.3  | 458.7  | 4074.7   | 1704.3  | 505.6  | 3576.3  | 1228.7  | 360.8  | 6719.7   | 2481.2  | 535.3  | 5268.6  | 1526.2  | 297.4  | 4013.5  | 1391.5  | 366.2  |
| Liver         | 8017.7  | 12095.6 | 6001.1 | 8289.5   | 11776.3 | 5594.5 | 6461.5  | 10562.9 | 7484.8 | 13563.3  | 20432.9 | 9971.3 | 11956.3 | 17309.5 | 7720.9 | 10866.1 | 17076.5 | 9285.2 |
| Gall Bladder  | 531.4   | 1442.3  | 653.9  | -        | -       | -      | 3040.6  | 3875.9  | 4066.5 | -        | -       | -      | -       | -       | -      | 5403.8  | 5632.2  | 3645.1 |
| Spleen        | 3358.7  | 1597.9  | 649.7  | 2678.4   | 1578.3  | 573.3  | 2530.2  | 1186.7  | 473.8  | 3792.7   | 1957.6  | 703.3  | 2978.2  | 1686.8  | 492.3  | 2493.5  | 1524.7  | 410.1  |
| Adrenal       | 3958.8  | 2508.6  | 766.3  | 2560.9   | 2797.2  | 936.6  | 2947.3  | 2691.4  | 737.0  | 3886.9   | 3554.9  | 1080.5 | 1798.3  | 1999.1  | 836.7  | 1690.9  | 1557.1  | 618.2  |
| Pancreas      | 4566.9  | 4285.0  | 1548.7 | 7553.6   | 9686.7  | 3196.2 | 5628.2  | 4949.3  | 1340.3 | 7230.5   | 7238.8  | 1296.4 | 7380.4  | 4042.2  | 1586.1 | 6180.3  | 7371.7  | 741.7  |
| Stomach cont. | 6585.2  | 558.8   | 942.5  | 3620.4   | 138.5   | 943.6  | 3175.0  | 395.1   | 1241.9 | 5076.6   | 1089.4  | 399.5  | 4273.1  | 441.8   | 166.4  | 4958.7  | 938.8   | 683.1  |
| ULI*          | 1935.5  | 1649.1  | 2734.5 | 1307.8   | 804.1   | 369.2  | 1624.8  | 1750.7  | 2433.6 | 2160.1   | 4522.7  | 2464.6 | 1996.8  | 1906.6  | 1784.4 | 1261.4  | 1785.1  | 3571.4 |
| SI            | 3086.8  | 2430.8  | 1986.7 | 2206.3   | 1285.8  | 569.1  | 2128.8  | 2378.0  | 2305.7 | 2008.3   | 4277.4  | 1205.2 | 2428.7  | 3408.3  | 1495.1 | 3041.1  | 2445.1  | 1070.6 |
| LLI"          | 1828.4  | 1472.3  | 740.6  | 887.5    | 907.1   | 1604.2 | 2001.7  | 1148.2  | 957.1  | 1848.2   | 1970.5  | 1545.4 | 1663.9  | 1688.2  | 600.3  | 2155.2  | 1448.4  | 1873.1 |
| Red marrow    | 1040.5  | 737.6   | 278.6  | 926.1    | 878.1   | 557.9  | 2049.0  | 1114.2  | 507.7  | 1656.2   | 1612.9  | 490.0  | 1517.7  | 1444.0  | 327.2  | 1156.7  | 960.3   | 494.1  |
| Kidney        | 9643.0  | 6843.7  | 1290.3 | 7285.8   | 5628.2  | 1220.8 | 7486.2  | 5306.0  | 2945.0 | 10443.4  | 6999.2  | 1650.0 | 9967.6  | 8590.9  | 1133.1 | 8611.3  | 4951.6  | 1741.4 |
| Muscle        | 929.1   | 727.2   | 166.4  | 1317.5   | 771.0   | 208.7  | 1112.4  | 721.2   | 164.9  | 1292.2   | 579.5   | 235.0  | 1095.6  | 673.7   | 229.8  | 1558.0  | 1480.6  | 185.6  |
| Bone          | 574.5   | 405.9   | 107.9  | 613.5    | 454.7   | 124.9  | 453.8   | 327.5   | 60.3   | 1099.7   | 625.6   | 139.2  | 763.8   | 516.5   | 95.7   | 560.5   | 260.7   | 107.3  |
| Urine Bladder | 74650.7 | 87039.5 | 230.7  | 124119.7 | 92533.9 | 198.5  | 41123.9 | 40333.9 | 45.1   | 143337.2 | 56450.5 | 316.1  | 29442.1 | 67343.0 | 55.5   | 74438.1 | 28639.0 | 34.5   |

\* Upper Large Intestine

^ Small Intestine

" Lower Large Intestine

- Missing value

**Table S6 - Process validation batches result**

| Batch no. | Volume (ml) | Activity (MBq) | Appearance                                                                  | Radiochemical purity (%) |              | pH   |              | DOTA-AE105 (mg/ml) | Cu-DOTA-AE105 (mg/ml) | Total DOTA-AE105 content (incl. Cu and other metals) (mg/ml) | Radionuclidic purity   |                |                                      | Ethanol (%) | Specific radioactivity (GBq/mmol) | Sterility | Endotoxins (EU/ml) |
|-----------|-------------|----------------|-----------------------------------------------------------------------------|--------------------------|--------------|------|--------------|--------------------|-----------------------|--------------------------------------------------------------|------------------------|----------------|--------------------------------------|-------------|-----------------------------------|-----------|--------------------|
|           |             |                |                                                                             | EOS                      | EOS 20 hours | EOS  | EOS 20 hours |                    |                       |                                                              | t <sub>1/2</sub> (min) | Gamma spectrum | Gamma spektrum after >2 weeks        |             |                                   |           |                    |
|           |             |                |                                                                             |                          |              |      |              |                    |                       |                                                              |                        |                |                                      |             |                                   |           |                    |
| 1         | 9.5         | 1115           | Clear and colourless solution, free from visible particulates or cloudiness | 93.3                     | 93.7         | 6.3  | 5.64         | 0.07               | 0.07                  | 0.51                                                         | 12.6                   | Pass           | Not different to background spectrum | 6.2         | 385                               | Complies  | < 0.0250           |
| 2         | 9.3         | 840            | Clear and colourless solution, free from visible particulates or cloudiness | 93.4                     | 92.1         | 6.29 | 5.41         | 0.26               | 0.12                  | 0.61                                                         | 12.5                   | Pass           | Not different to background spectrum | 6.2         | 248                               | Complies  | < 0.0500           |
| 3         | 9.4         | 1300           | Clear and colourless solution, free from visible particulates or cloudiness | 98                       | 94.3         | 5.34 | 5.13         | 0.17               | 0.073                 | 0.49                                                         | 12.6                   | Pass           | Not different to background spectrum | 6.67        | 429                               | Complies  | 0.1029             |

| <b>Table S7: Product release criteria</b>            |                                                                                                                               |
|------------------------------------------------------|-------------------------------------------------------------------------------------------------------------------------------|
| <b>ID</b>                                            | <b>Specifications</b>                                                                                                         |
| Active Substance                                     | [ <sup>64</sup> Cu]DOTA-AE105<br>Radioactive half-life: 12.4 – 13.0 hours<br>Gamma Spectrum shows only 511 and 1022 keV peaks |
| Radioactivity                                        | 200 MBq to 1.3 GBq                                                                                                            |
| Appearance                                           | Clear and colourless solution, free from visible particulates or cloudiness                                                   |
| Volume                                               | 10 ± 0.5 ml                                                                                                                   |
| Half-life (T <sub>1/2</sub> )                        | T <sub>1/2</sub> = 12.4-13.0 hours                                                                                            |
| Radionuclidic purity                                 | >99.9% (<0.1% radionuclidic impurities)                                                                                       |
| Radiochemical purity                                 | >91 %                                                                                                                         |
| pH                                                   | Between 4.5 and 8.5                                                                                                           |
| Microbiology                                         | Passes Test for Sterility Ph.Eur.                                                                                             |
| Microbiology                                         | Endotoxins < 0.125 IU/mL                                                                                                      |
| Microbiology                                         | Bioburden: <10 c.f.u./100 ml                                                                                                  |
| Shelf Life                                           | 20 hours                                                                                                                      |
| Ethanol                                              | 3-10 % (w/v)                                                                                                                  |
| DOTA-AE105 content                                   | ≤ 1 µg/mL ( <b>maximal injected dose of 1.5 µg</b> )                                                                          |
| Cu-DOTA-AE105 content                                | ≤ 1 µg/mL ( <b>maximal injected dose of 1.5 µg</b> )                                                                          |
| Total DOTA-AE105 content (incl. Cu and other metals) | ≤ 1 µg/mL ( <b>maximal injected dose of 1.5 µg</b> )                                                                          |
| Specific Activity at end of synthesis:               | > 20 GBq/µmol                                                                                                                 |
